# Supplementary material for: Drug Repositioning through Systematic Mining of Gene Coexpression Networks in Cancer
Source: PLoS One. 2016 Nov 8;11(11):e0165059. doi: 10.1371/journal.pone.0165059 (PMC5100910; doi:10.1371/journal.pone.0165059)
Supplement: S1 Table — (XLSX) [file pone.0165059.s001.xlsx]

## Sheet: Datasets
Dataset label	Cancer type	GEO series	Platform	GEO release year	GEO Series title	Citation PubMed IDs	Organization	City	Country	Number of WGCNA modules
1_Breast_GSE20685_U133Plus_327_Taiwan	Breast	GSE20685	U133 Plus 2.0	2011	Microarray-based molecular subtyping of breast cancer	21501481	Koo Foundation SYS Cancer Center	Taipei	Taiwan	50
2_Breast_GSE21653_U133Plus_266_France	Breast	GSE21653	U133 Plus 2.0	2010	A gene expression signature identifies two prognostic subgroups of basal breast cancer	20490655, 22110708	Institut Paoli-Calmettes	Marseille	France	35
3_Breast_GSE12276_U133Plus_204_Netherlands	Breast	GSE12276	U133 Plus 2.0	2009	Expression data from primary breast tumors	19421193	Erasmus Medical Centre	Rotterdam	Netherlands	60
4_Breast_GSE5460_U133Plus_129_USA	Breast	GSE5460	U133 Plus 2.0	2007	Predicting Features of Breast Cancer with Gene Expression Patterns	18297396	Dana Farber Cancer Institute	Boston	USA	40
5_Breast_GSE16446_U133Plus_120_Belgium	Breast	GSE16446	U133 Plus 2.0	2010	Predicting the efficacy of anthracyclines in breast cancer (BC) patients: The results of the TOP trial	21422418, 20098429, 20189874	Institut Jules Bordet	Bruxelles	Belgium	38
6_Breast_GSE23177_U133Plus_116_Belgium	Breast	GSE23177	U133 Plus 2.0	2011	Prediction of lymph node involvement in breast cancer from primary tumor tissue using gene expression profiling and miRNAs.	21116709	Flanders Institute for Biotechnology (VIB)	Leuven	Belgium	57
7_Breast_GSE28821_U133Plus_89_USA	Breast	GSE28821	U133 Plus 2.0	2011	Laser-capture microdissected invasive micropapillary carcinomas of the breast	21633166	Vanderbilt University	Nashville	USA	21
8_Breast_GSE18864_U133Plus_84_Denmark	Breast	GSE18864	U133 Plus 2.0	2009	Tumor expression data from neoadjuvant trial of cisplatin monotherapy in triple negative breast cancer patients	20100965, 20098429, 20189874	Technical University of Denmark	Lyngby	Denmark	31
9_Breast_GSE18728_U133Plus_61_USA	Breast	GSE18728	U133 Plus 2.0	2009	Expression data from human breast cancers pre and post chemothrapy	20012355	University of Washington	Seattle	USA	50
10_Breast_GSE29431_U133Plus_54_Spain	Breast	GSE29431	U133 Plus 2.0	2011	Identifying breast cancer biomarkers	NA	Center for International Health Research at Barcelona (CRESIB)	Barcelona	Spain	30
11_Breast_GSE10780_U133Plus_42_USA	Breast	GSE10780	U133 Plus 2.0	2009	Proliferative genes dominate malignancy-risk gene signature in histologically-normal breast tissue	19266279	Moffitt Cancer Center	Tampa	USA	21
12_Breast_GSE22035_U133Plus_43_France	Breast	GSE22035	U133 Plus 2.0	2011	Gene expression data in estrogen receptor alpha positive breast tumors with and without PIK3CA mutations.	21209903	Centre Rene Huguenin	Saint Cloud	France	45
13_Breast_GSE12763_U133Plus_30_USA	Breast	GSE12763	U133 Plus 2.0	2009	Gene expression profiling of 30 human breast cancers	19567590	Genentech	South San Francisco	USA	50
14_Breast_GSE4922_U133A_289_Sweden	Breast	GSE4922	U133A	2006	Genetic Reclassification of Histologic Grade Delineates New Clinical Subtypes of Breast Cancer	17079448	Genome Institute of Singapore	Singapore	Singapore	28
15_Breast_GSE2034_U133A_286_USA	Breast	GSE2034	U133A	2005	Breast cancer relapse free survival	15721472, 17013392	Veridex	San Diego	USA	23
16_Breast_GSE11121_U133A_200_Germany	Breast	GSE11121	U133A	2008	The humoral immune system has a key prognostic impact in node-negative breast cancer	18593943	Bayer Technology Services GmbH	Leverkusen	Germany	25
17_Breast_GSE17705_U133A_195_USA_MDA	Breast	GSE17705	U133A	2010	Endocrine Sensitivity Index Validation Dataset	20697068	Nuvera Biosciences	Woburn	USA	34
18_Breast_GSE17705_U133A_102_USA_JBI	Breast	GSE17705	U133A	2010	Endocrine Sensitivity Index Validation Dataset	20697068	Nuvera Biosciences	Woburn	USA	29
19_Breast_GSE1456_U133A_159_Sweden	Breast	GSE1456	U133A	2006	Gene expression of breast cancer tissue in a large population-based cohort of Swedish patients	16280042	Karolinska Institutet	Stockholm	Sweden	30
20_Breast_GSE24185_U133A_103_USA	Breast	GSE24185	U133A	2011	Gene transcription signature of obesity in breast cancer	21750966	Baylor College of Medicine	Houston	USA	29
21_Colon_GSE14333_U133Plus_189_LMC	Colon	GSE14333	U133 Plus 2.0	2010	Expression data from 290 primary colorectal cancers	19996206	Ludwig Institute for Cancer Research	Parkville	Australia	37
22_Colon_GSE14333_U133Plus_101_RMH	Colon	GSE14333	U133 Plus 2.0	2010	Expression data from 290 primary colorectal cancers	19996206	Ludwig Institute for Cancer Research	Parkville	Australia	34
23_Colon_GSE17536_U133Plus_177_USA	Colon	GSE17536	U133 Plus 2.0	2009	Metastasis Gene Expression Profile Predicts Recurrence and Death in Colon Cancer Patients (Moffitt Samples)	19914252	Vanderbilt University	Nashville	USA	38
24_Colon_GSE26682_U133Plus_176_USA	Colon	GSE26682	U133 Plus 2.0	2011	MRE11 Deficiency Increases Sensitivity to Poly(ADP-ribose) Polymerase Inhibition in Microsatellite Unstable Colorectal Cancers.	21300766, 21976543	University of Michigan	Ann Arbor	USA	58
25_Colon_GSE26682_U133A_155_USA	Colon	GSE26682	U133A	2011	MRE11 Deficiency Increases Sensitivity to Poly(ADP-ribose) Polymerase Inhibition in Microsatellite Unstable Colorectal Cancers.	21300766, 21976543	University of Michigan	Ann Arbor	USA	29
26_Colon_GSE21510_U133Plus_123_Tokyo	Colon	GSE21510	U133 Plus 2.0	2011	Clinical Significance of Osteoprotegerin Expression in Human Colorectal Cancer	21270110	Tokyo Medical and Dental University	Bunkyo-ku	Japan	50
27_Colon_GSE20916_U133Plus_81_Warszawa	Colon	GSE20916	U133 Plus 2.0	2010	Modeling oncogenic signaling in colon tumors by multidirectional analyses of microarray data	20957034	Centrum Onkologii Instytut im. Marii Sk+?odowskiej Curie	Warszawa	Poland	31
28_Colon_GSE26906_U133Plus_90_France	Colon	GSE26906	U133 Plus 2.0	2011	APC colon stage II	NA	Institut Paoli-Calmettes	Marseille	France	61
29_Colon_GSE33113_U133Plus_90_Netherlands	Colon	GSE33113	U133 Plus 2.0	2011	AMC colon cancer AJCCII	22056143	Academic Medical Centre, University of Amsterdam	Amsterdam	Netherlands	62
30_Colon_GSE9348_U133Plus_70_Singapore	Colon	GSE9348	U133 Plus 2.0	2010	Expression data from healthy controls and early stage CRC patient's tumor	20143136	Singapore General Hospital	Singapore	Singapore	68
31_Colon_GSE17537_U133Plus_55_USA	Colon	GSE17537	U133 Plus 2.0	2009	Metastasis Gene Expression Profile Predicts Recurrence and Death in Colon Cancer Patients (VMC Samples)	19914252	Vanderbilt University	Nashville	USA	66
32_Colon_GSE23878_U133Plus_35_SaudiArabia	Colon	GSE23878	U133 Plus 2.0	2010	Genome Wide Expression Analysis of Middle Eastern Colorectal Cancer Reveals FOXM1 as a Novel Target for Cancer Therapy	NA	King Faisal Specialist Hospital	Riyadh	Saudi Arabia	60
33_Colon_GSE12945_U133A_62_Germany	Colon	GSE12945	U133A	2009	Expression data from colorectal cancers	19399471	Signature Diagnostics AG	Potsdam	Germany	37
34_Colon_GSE4045_U133A_37_Finland	Colon	GSE4045	U133A	2006	Classification of serrated colorectal tumors	16819509	University of Helsinki	Helsinki	Finland	55
35_Glioma_GSE16011_U133Plus_276_Netherlands	Glioma	GSE16011	U133 Plus 2.0	2010	Intrinsic Gene Expression Profiles of Gliomas are a Better Predictor of Survival than Histology	19920198	Erasmus MC	Rotterdam	Netherlands	39
36_Glioma_GSE00000_U133Plus_155_USA	Glioma	NA	U133 Plus 2.0	2009	Glioma Molecular Diagnostic Initiative	19208739, 19244127	Glioma Molecular Diagnostic Initiative	Multiple cities	USA	30
37_Glioma_GSE00000_U133Plus_167_USA	Glioma	NA	U133 Plus 2.0	2009	Glioma Molecular Diagnostic Initiative	19208739, 19244127	Glioma Molecular Diagnostic Initiative	Multiple cities	USA	41
38_Glioma_GSE4271_U133A_76_USA	Glioma	GSE4271	U133A	2006	Molecular subclasses of high-grade glioma: prognosis, disease progression, and neurogenesis	16530701, 20068170	Genentech, Inc.	South San Francisco	USA	62
39_Glioma_GSE4412_U133A_74_USA	Glioma	GSE4412	U133A	2006	Freij-affy-human-91666	15374961	NIH Neuroscience Microarray Consortium	Los Angeles	USA	28
40_Glioma_GSE7696_U133Plus_84_Switzerland	Glioma	GSE7696	U133 Plus 2.0	2008	Glioblastoma from a homogenous cohort of patients treated within clinical trial	18565887, 21642372	CHUV	Lausanne	Switzerland	42
41_Glioma_GSE19578_U133Plus_53_USA	Glioma	GSE19578	U133 Plus 2.0	2010	Integrated molecular genetic profiling of pediatric-high grade gliomas reveals key differences with adult disease	20479398, 21659463	St Jude Children's Research Institute	Memphis	USA	41
42_Glioma_GSE5675_U133Plus_41_USA	Glioma	GSE5675	U133 Plus 2.0	2007	Pilocytic astrocytoma	17283119	Washington University School of Medicine in Saint Louis	Saint Louis	USA	31
43_Glioma_GSE24072_U133A_32_Spain	Glioma	GSE24072	U133A	2010	Expression of Vav1 in glioblastoma multiforme	NA	Center Cancer Research	Salamanca	Spain	43
44_Glioma_GSE2817_U133Plus_30_UK	Glioma	GSE2817	U133 Plus 2.0	2005	Wavelet modelling of microarray data provides chromosomal pattern of expression which predicts survival in gliomas	17140431	Imperial College London	London	United Kingdom	30
45_Glioma_GSE15824_U133Plus_30_Switzerland	Glioma	GSE15824	U133 Plus 2.0	2011	Gene expression profiling of human gliomas and human glioblastoma cell lines	21406405	Friedrich Miescher Institute for Biomedical Research	Basel	Switzerland	38
46_Lung_GSE31210_U133Plus_226_Japan	Lung	GSE31210	U133 Plus 2.0	2011	Gene expression data for pathological stage I-II lung adenocarcinomas	22080568	National Cancer Center Research Institute	Chuo-ku	Japan	53
47_Lung_GSE28571_U133Plus_100_Sweden	Lung	GSE28571	U133 Plus 2.0	2011	Gene Copy Number Aberrations are Associated with Survival in Histological Subgroups of Non-Small Cell Lung Cancer (expression data)	22011649	Uppsala Array Platform	Uppsala	Sweden	59
48_Lung_GSE19188_U133Plus_91_Netherlands	Lung	GSE19188	U133 Plus 2.0	2010	Expression data for early stage NSCLC	20421987	Erasmus MC	Rotterdam	Netherlands	40
49_Lung_GSE12667_U133Plus_75_USA	Lung	GSE12667	U133 Plus 2.0	2008	Discovery of somatic mutations in lung adenocarcinomas	18948947	Washington University School of Medicine	St Louis	USA	44
50_Lung_GSE10445_U133Plus_72_France	Lung	GSE10445	U133 Plus 2.0	2009	Merlion lung cancer study	19176396	University Paris-Sud	Villejuif	France	34
51_Lung_GSE19804_U133Plus_60_Taiwan	Lung	GSE19804	U133 Plus 2.0	2011	Genome-wide screening of transcriptional modulation in non-smoking female lung cancer in Taiwan	20802022	National Taiwan University, Taiwan	Taipei	Taiwan	44
52_Lung_GSE10245_U133Plus_58_Germany	Lung	GSE10245	U133 Plus 2.0	2009	Gene expression differences between adenocarcinoma and squamous cell carcinoma in human NSCLC	18486272	German Cancer Research Center and National Center of Tumor Diseases	Heidelberg	Germany	57
53_Lung_GSE18842_U133Plus_46_Spain	Lung	GSE18842	U133 Plus 2.0	2010	Gene expression analysis of human lung cancer and control samples	20878980	Hospital Universitario San Cecilio	Granada	Spain	36
54_Lung_GSE27716_U133Plus_40_USA	Lung	GSE27716	U133 Plus 2.0	2011	Expression data from Columbia Lung Adenocarcinoma Human Tumor Cells	21911454	Mount Sinai School of Medicine	New York	USA	49
55_Lung_GSE14814_U133A_90_Canada	Lung	GSE14814	U133A	2010	Prognostic and Predictive Gene Signature for Adjuvant Chemotherapy in Resected Non-Small Cell Lung Cancer	20823422	Ontario Cancer Institute/ Princess Margaret Hospital	Toronto	Canada	43
56_Lung_GSE10072_U133A_58_USA	Lung	GSE10072	U133A	2008	Gene expression signature of cigarette smoking and its role in lung adenocarcinoma development and survival	18297132	National Cancer Institute, NIH	Rockville	USA	32
57_Lung_GSE31547_U133A_30_USA	Lung	GSE31547	U133A	2011	MSKCC-A Primary Lung Cancer Specimens	NA	UT Southwestern Medical Center	Dallas	USA	48
58_Ovarian_GSE9891_U133Plus_285_Australia	Ovarian	GSE9891	U133 Plus 2.0	2008	Expression profile of 285 ovarian tumour samples	18698038	PeterMacCallum Cancer Centre	Melbourne	Australia	77
59_Ovarian_GSE26193_U133Plus_107_France	Ovarian	GSE26193	U133 Plus 2.0	2011	Control of oxidative stress by miRNA and impact on ovarian tumorigenesis	NA	Institut Curie	PARIS	France	53
60_Ovarian_GSE27651_U133Plus_43_USA	Ovarian	GSE27651	U133 Plus 2.0	2011	The Anterior Gradient Homolog 3 (AGR3) Gene Is Associated with Differentiation and Survival in Ovarian Cancer	21451362	UT M. D. Anderson Cancer Center	Houston	USA	28
61_Ovarian_GSE26712_U133A_185_USA	Ovarian	GSE26712	U133A	2011	A Gene Signature Predicting for Survival in Suboptimally Debulked Patients with Ovarian Cancer	18593951	MGH	Boston	USA	30
62_Ovarian_GSE6008_U133A_99_USA	Ovarian	GSE6008	U133A	2007	Human ovarian tumors and normal ovaries	16452189, 19843521, 17418409	University of Michigan	Ann Arbor	USA	37
63_Ovarian_GSE14764_U133A_80_Germany	Ovarian	GSE14764	U133A	2009	A Prognostic Gene Expression Index in Ovarian Cancer	19294737	Charite - Universitaetsmedizin Berlin	Berlin	Germany	25
64_Ovarian_GSE27943_U133A_46_USA	Ovarian	GSE27943	U133A	2011	Gene Expression Array of Human Ovarian Cancer.	22174824	Cold Spring Harbor Laboratory	Cold Spring Harbor	USA	32
65_Prostate_GSE17951_U133Plus_108_USA	Prostate	GSE17951	U133 Plus 2.0	2009	Gene expression analysis of prostate cancer samples using Affymetrix U133Plus2 array	20663908, 21459804	Vaccine Research Institute of San Diego	San Diego	USA	44
66_Prostate_GSE32448_U133Plus_40_USA	Prostate	GSE32448	U133 Plus 2.0	2011	CPDR tumor-benign 80 genechip dataset	22183773	CPDR USU	Rockville	USA	24
67_Prostate_GSE25136_U133A_79_USA	Prostate	GSE25136	U133A	2010	Optimizing molecular signatures for prostate cancer recurrence	19343730	M. D. Anderson Cancer Center Orlando	Orlando	USA	22
68_Prostate_GSE32269_U133A_51_USA	Prostate	GSE32269	U133A	2011	Expression data for primary localized prostate cancer versus castration-resistant bone metastatic prostate cancer	NA	Beth Israel Deaconess Medical Center	Boston	USA	35
69_Kidney_GSE17818_U133Plus_102_USA	Kidney	GSE17818	U133 Plus 2.0	2010	Somatic Mutation Screen of Clear Cell RCC II	20054297, 21642374	Van Andel Institute	Grand Rapids	USA	44
70_Kidney_GSE11151_U133Plus_62_Netherlands	Kidney	GSE11151	U133 Plus 2.0	2008	Gene expression data from different types of renal tumors and normal kidneys	19445733, 19680475, 20440404	Erasmus Medical Centre Rotterdam	Rotterdam	Netherlands	32
71_Kidney_GSE17816_U133Plus_36_USA	Kidney	GSE17816	U133 Plus 2.0	2010	Somatic Mutation Screen of Clear Cell RCC I	20054297, 21642374	Van Andel Institute	Grand Rapids	USA	34
72_Kidney_GSE19982_U133Plus_30_USA	Kidney	GSE19982	U133 Plus 2.0	2010	Gene expression discriminates chromophobe renal cell carcinoma and oncocytoma	20462447	Van Andel Research Institute	Grand Rapids	USA	60
73_Kidney_GSE10320_U133A_144_USA	Kidney	GSE10320	U133A	2009	Predicting Relapse in Favorable Histology Wilms Tumor Using Gene Expression	19208794	Children's Memorial Research Center	Chicago	USA	28
74_Kidney_GSE15641_U133A_69_USA	Kidney	GSE15641	U133A	2009	Gene signatures of progression and metastasis in renal cell cancer	16115910	Harvard Medical School	Boston	USA	41
75_Gastric_GSE15459_U133Plus_200_Germany	Gastric	GSE15459	U133 Plus 2.0	2009	Gastric Cancer Project '08 (Singapore Patient Cohort)	19798449	Roche Diagnostics GmbH	Penzberg	Germany	32
76_Gastric_GSE22377_U133Plus_43_Germany	Gastric	GSE22377	U133 Plus 2.0	2011	mRNA expression data from human adenocarcinomas of the stomach	21701537	ECRC	Berlin	Germany	57
77_Gastric_GSE13911_U133Plus_38_Italy	Gastric	GSE13911	U133 Plus 2.0	2008	Expression data from primary gastric tumors (MSI and MSS) and adjacent normal samples	19081245	IRBM (MERCK)	Pomezia(Rome)	Italy	60
78_Melanoma_GSE7553_U133Plus_82_USA	Melanoma	GSE7553	U133 Plus 2.0	2008	Gene Expression Patterns Involved in the Malignant Transformation and Progression of Metastatic Melanoma	18442402	Moffitt Cancer Center &amp; Research Institute	Tampa	USA	47
79_Melanoma_GSE22138_U133Plus_63_France	Melanoma	GSE22138	U133 Plus 2.0	2010	Expression Data from Uveal Melanoma primary tumors.	21135111	Institut Curie	Paris Cedex 05	France	33
80_Melanoma_GSE19293_U133Plus_52_USA	Melanoma	GSE19293	U133 Plus 2.0	2010	In-transit extremity melanoma II	20371714	Duke University Medical Center	Durham	USA	59
81_Melanoma_GSE10282_U133Plus_43_USA	Melanoma	GSE10282	U133 Plus 2.0	2008	In-transit extremity melanoma I	20371714	Duke University Medical Center	Durham	USA	56
82_Melanoma_GSE8401_U133A_31_USA	Melanoma	GSE8401	U133A	2007	Gene Signature for Aggression of Melanoma Metastases - Melanoma Metastasis	18505921	MIT	cambridge	USA	32

## Sheet: Readme
This table contains a description of all the datasets used as input in this study
Dataset labels are structured as follows: <dataset index>_<cancer type>_<GEO ID>_<platform>_<number of tumor samples in the dataset>_<data origin>
Module statistics (column K) represents the number of final WGCNA modules identified in respective datasets
Datasets 36 and 37 were downloaded from the specialized glioma Rembrandt database (http://cabig.cancer.gov/solutions/conductresearch/rembrandt/); these datasets are described in Li et al 2009 (PMID 19244127)
